# Supplementary material for: Supramolecular gel-derived NiCo-N-doped porous carbon/CNT hybrid-modified separator enabling enhanced polysulfide redox kinetics and effective shuttle suppression in lithium–sulfur batteries
Source: Royal Society of Chemistry journal article supplement (doi:10.1039/d6ra01599a), 2026-05-01
Supplement: d6ra01599a1.pdf [file d6ra01599a1.pdf]

**Fig. S1** Thermogravimetric analysis (TGA) curves of KB/S composite in Ar.

## Supplementary information

# Supramolecular gel-derived NiCo-N doped porous carbon/CNT hybrid modified separator enabling enhanced polysulfide redox kinetics and effective shuttle suppression in lithium-sulfur batteries

Kyu Sang Lee <sup>a, b</sup>, Taeyoung Jung <sup>a</sup>, Youngseul Cho <sup>d</sup>, Godeung Park <sup>b, e</sup>, Hyunsoo Lim <sup>b</sup>, Seonmin Kim <sup>c</sup>, Churl Seung Lee <sup>c</sup>, Jun Ho Song <sup>b</sup>, Yuanzhe Piao <sup>a, \*</sup>

<sup>a</sup> Department of Applied Bioengineering, Graduate School of Convergence Science and Technology, Seoul National University, 145 Gwanggyo-ro, Yeongtong-gu, Suwon-si, Gyeonggi-do, 443-270, Republic of Korea.

<sup>b</sup> Advanced Battery Research Center, Korea Electronics Technology Institute (KETI), 25, Saenari-ro, Bundang-gu, Seongnam-si, Gyeonggi-do 13509, Republic of Korea.

<sup>c</sup> ITC Nano Convergence Technology Research Center, Korea Electronics Technology Institute (KETI), 25, Saenari-ro, Bundang-gu, Seongnam-si, Gyeonggi-do 13509, Republic of Korea.

<sup>d</sup> Program in Nano Science and Technology, Graduate School of Convergence Science and Technology, Seoul National University, 145 Gwanggyo-ro, Yeongtong-gu, Suwon-si, Gyeonggi-do, 16229, Republic of Korea.

<sup>e</sup> Department of Chemical and Biomolecular Engineering, Yonsei University, Seoul 03722, Republic of Korea.

\* Corresponding author

E-mail: parkat9@snu.ac.kr (Y. Piao) Tel: +82-31-888-9141

- Fig. S2** High-resolution XPS spectrum of Ni-NPC (a) C 1s, (b) N 1s, and (c) Ni 2p.
- Fig. S3** High-resolution XPS spectrum of Co-NPC (a) C 1s, (b) N 1s, and (c) Co 2p.
- Fig. S4** CV curves of (a) PP, (b) Co-NPC@PP, and (c) Ni-NPC@PP at different scan rates from 0.1 to 1.0 mV s<sup>-1</sup>.
- Fig. S5** Charge/discharge profiles of (a) PP, (b) Co-NPC@PP, and (c) Ni-NPC@PP cell at various current densities.
- Fig. S6** Long-term cycling performance of Li-S cells with different separators at 2 C for 500 cycles.
- Fig. S7** Self-discharge profiles of Li-S cells with (a) pristine PP, (b) Co-NPC@PP, (c) Ni-NPC@PP, and (d) NiCo-NPC/CNT@PP, monitored by OCV for 72 h after charging to 2.8 V
- Fig. S8** Cycling performance of NiCo-NPC/CNT@PP cell at a low electrolyte to sulfur ratio of 5.4  $\mu\text{l mg}^{-1}$  at 0.2 C for 200 cycles.
- Fig. S9** High-resolution N 1s XPS spectrum of NiCo-NPC/CNT after Li<sub>2</sub>S<sub>6</sub> adsorption.
- Fig. S10** SEM images of (a) PP and (b) NiCo-NPC/CNT@PP before cycling, and (c) PP and (d) NiCo-NPC/CNT@PP after cycling.
- Fig. S11** Contact angle measurement of the electrolyte on (a) Co-NPC@PP, and (b) Ni-NPC@PP.
- Table S1** Capacity decay rate per cycle of Li-S cells at 1 C after 500 cycles.
- Table S2** Electrochemical performance comparison chart.

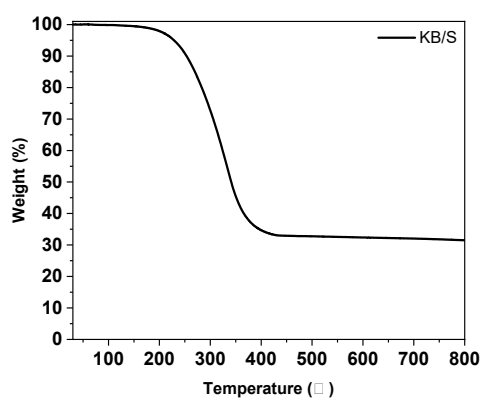

**Fig. S1** Thermogravimetric analysis (TGA) curves of KB/S composite in Ar.

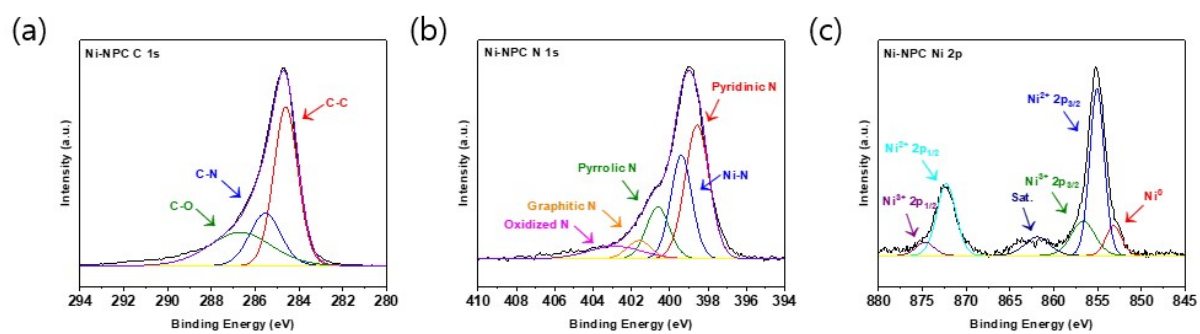

**Fig. S2** High-resolution XPS spectrum of Ni-NPC (a) C 1s, (b) N 1s, and (c) Ni 2p.

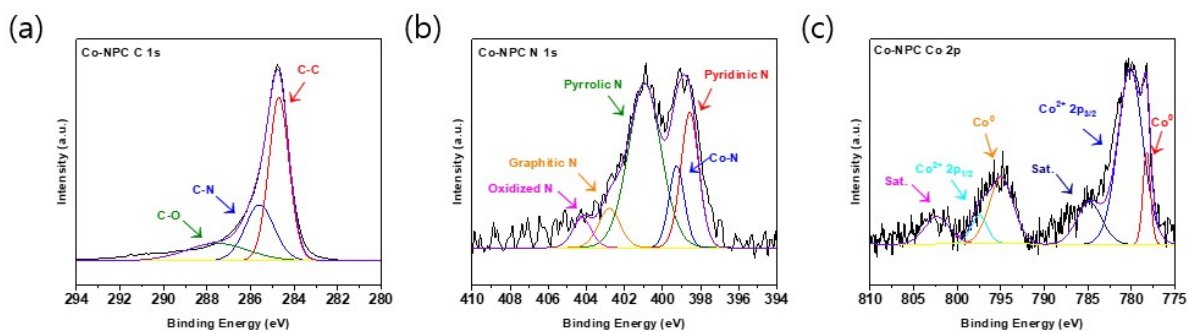

**Fig. S3** High-resolution XPS spectrum of Co-NPC (a) C 1s, (b) N 1s, and (c) Co 2p.

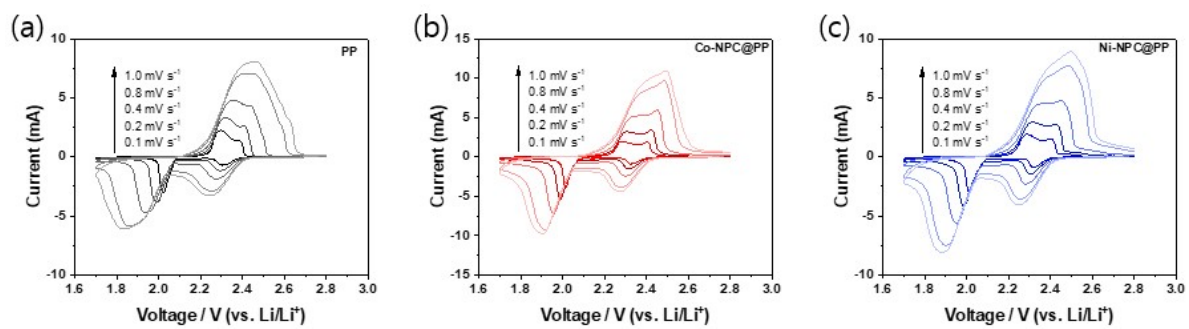

**Fig. S4** CV curves of (a) PP, (b) Co-NPC@PP, and (c) Ni-NPC@PP at different scan rates from 0.1 to 1.0 mV s<sup>-1</sup>.

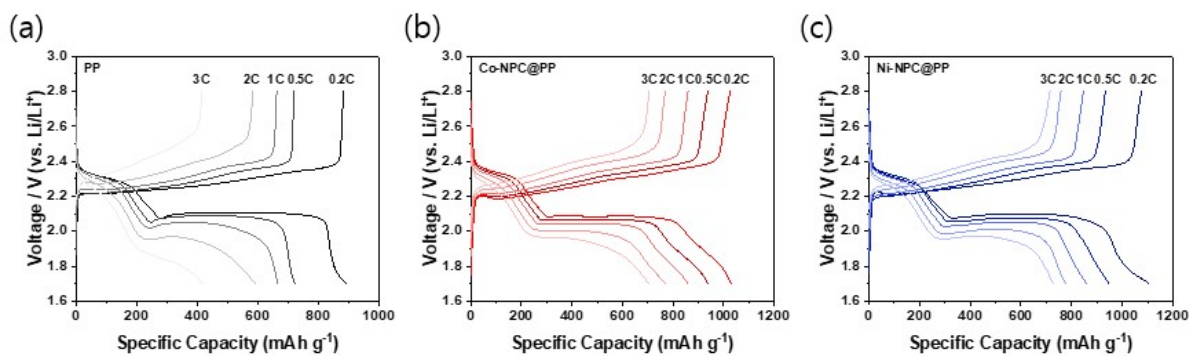

**Fig. S5** Charge/discharge profiles of (a) PP, (b) Co-NPC@PP, and (c) Ni-NPC@PP cell at various current densities.

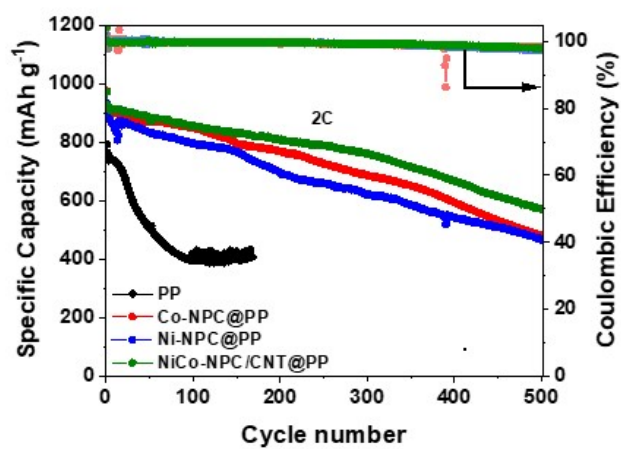

**Fig. S6** Long-term cycling performance of Li-S cells with different separators at 2 C for 500 cycles.

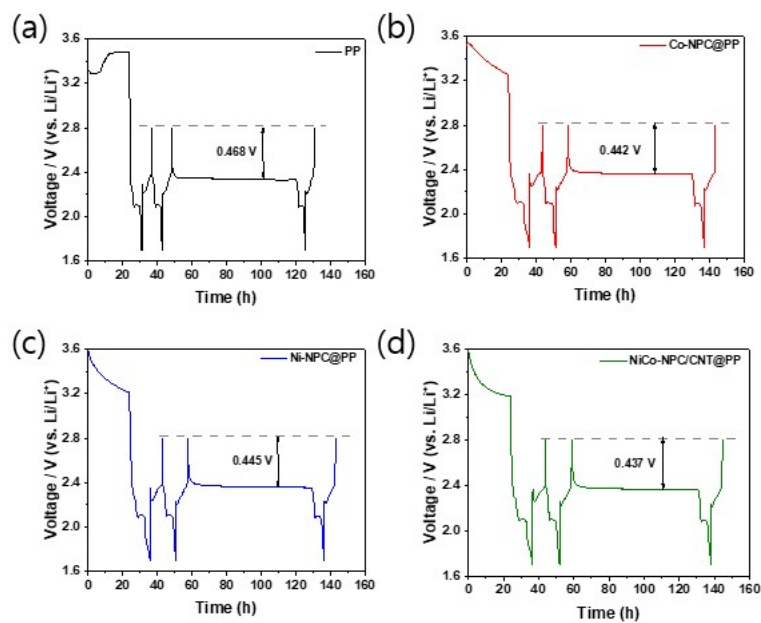

**Fig. S7** Self-discharge profiles of Li-S cells with (a) PP, (b) Co-NPC@PP, (c) Ni-NPC@PP, and (d) NiCo-NPC/CNT@PP, monitored by OCV for 72h after charging to 2.8 V

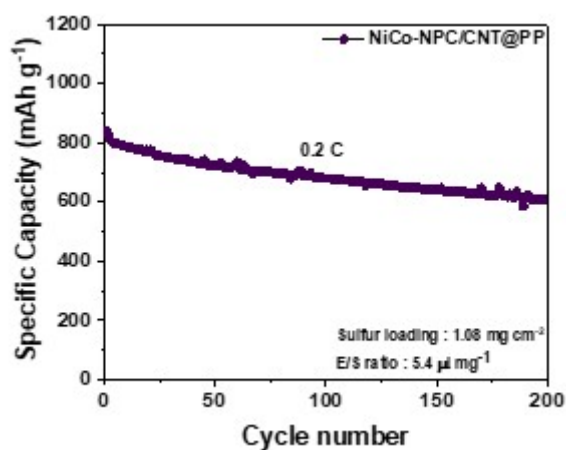

**Fig. S8** Cycling performance of NiCo-NPC/CNT@PP cell at a low electrolyte to sulfur ratio of  $5.4 \mu\text{l mg}^{-1}$  at 0.2 C for 200 cycles.

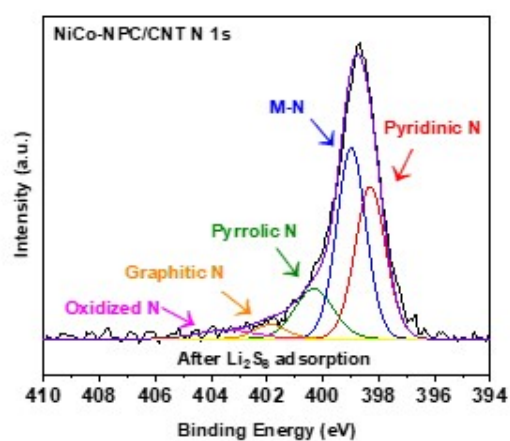

**Fig. S9** High-resolution N 1s XPS spectrum of NiCo-NPC/CNT after  $\text{Li}_2\text{S}_6$  adsorption.

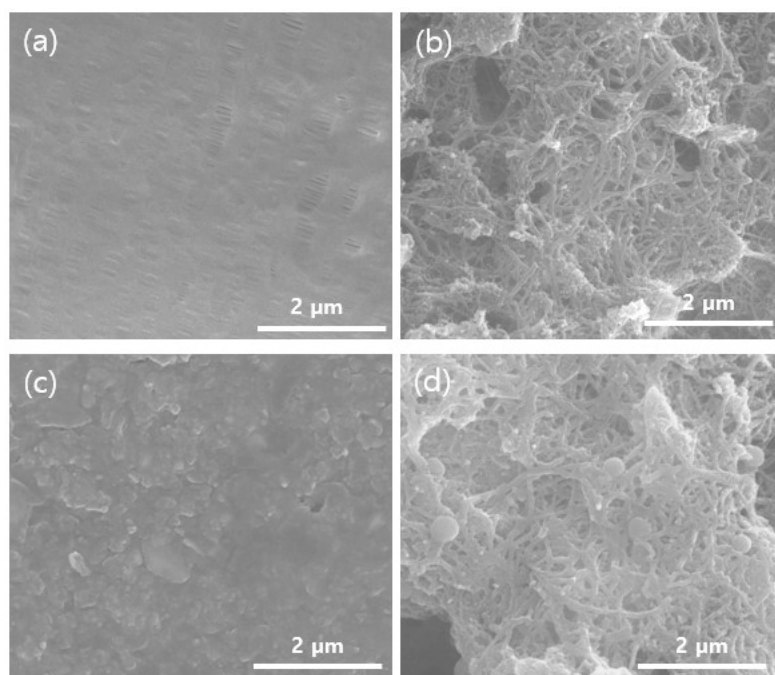

**Fig. S10** SEM images of (a) PP and (b) NiCo-NPC/CNT@PP before cycling, and (c) PP and (d) NiCo-NPC/CNT@PP after cycling.

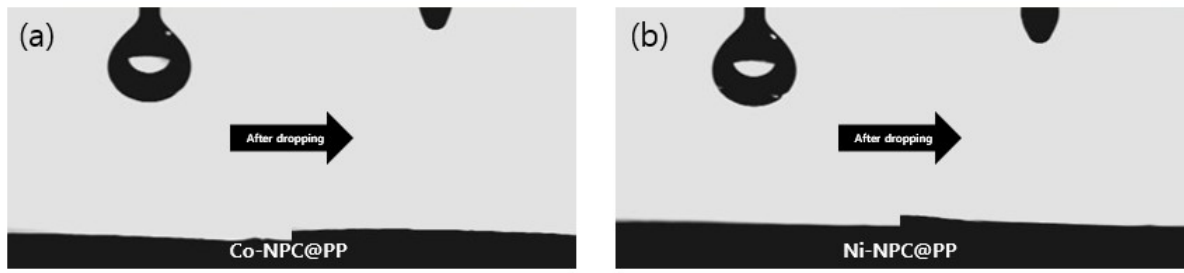

**Fig. S11** Contact angle measurement of the electrolyte on (a) Co-NPC@PP, and (b) Ni-NPC@PP.

**Table S1.** Capacity decay rate per cycle of Li-S cells at 1 C after 500 cycles.

| Sample          | Capacity decay (%) |
|-----------------|--------------------|
| Co-NPC@PP       | 0.102              |
| Ni-NPC@PP       | 0.100              |
| NiCo-NPC/CNT@PP | 0.072              |

**Table S2.** Electrochemical performance comparison chart.

| Sample                     | Sulfur loading (mg cm <sup>-2</sup> ) | Initial specific capacity (mAh g <sup>-1</sup> ) | E/S ratio (μl cm <sup>-2</sup> ) | final specific capacity (mAh g <sup>-1</sup> ) | Cycle numbers /C-rate | Reference        |
|----------------------------|---------------------------------------|--------------------------------------------------|----------------------------------|------------------------------------------------|-----------------------|------------------|
| NiCo@C/CNT                 | 0.8 ~ 1.4                             | 1039                                             | -                                | 637                                            | 300 / 0.5 C           | [1] <sup>1</sup> |
| CoSe <sub>2</sub> @C-N/CNT | 1.0 ~ 1.4                             | 1120                                             | 25 ~ 35                          | 761                                            | 300 / 1 C             | [2] <sup>2</sup> |
| NCOSe                      | 1.5                                   | 1277                                             | 20                               | 793                                            | 200 / 0.2 C           | [3] <sup>3</sup> |
| 2D NiCo MOF/CNT            | 1.2                                   | 1170.6                                           | 15 ~ 30                          | 736.5                                          | 200 / 1 C             | [4] <sup>4</sup> |
| Co@C/CNT                   | 1.0                                   | 1007.3                                           | -                                | 789.4                                          | 200 / 1 C             | [5] <sup>5</sup> |
| Ni-CoSe <sub>2</sub> @NC   | 2.4                                   | 930.3                                            | -                                | 399.2                                          | 400 / 0.5 C           | [6] <sup>6</sup> |
| Co-Ni@C                    | 1.0                                   | 1172                                             | 20                               | 655                                            | 400 / 1 C             | [7] <sup>7</sup> |
| CoS@NC/NCNT                | 1.0                                   | 1046.4                                           | -                                | 612.1                                          | 500 / 1 C             | [8] <sup>8</sup> |
| CoS <sub>2</sub> -NC@CNTs  | 1.0                                   | 1408.5                                           | -                                | 619.2                                          | 500 / 1 C             | [9] <sup>9</sup> |
| NiCo-NPC/CNT               | 1.2                                   | 1268.9                                           | 30                               | 649.0                                          | 500 / 1 C             | <b>This work</b> |
|                            | 1.08                                  | 840.8                                            | 5.4                              | 606.1                                          | 200 / 0.2 C           |                  |
|                            | 11                                    | 204.4                                            | 6                                | 296.6                                          | 120 / 0.2 C           |                  |

## References

1. J. Xiong, X. Liu, P. Xia, X. Guo, S. Lu, H. Lei, Y. Zhang and H. Fan, *J. Colloid. Interface. Sci.*, 2023, **652**, 1417–1426.
2. Y. Luo, H. Bai, B. Li, X. Song, J. Zhao, Y. Xiao, S. Lei and B. Cheng, *J. Alloys Compd.*, 2021, **879**, 160368.
3. B. Yu, J.-H. Yu, J. H. Sung, J. Pan and J.-S. Yu, *J. Energy Storage*, 2025, **113**, 115599.
4. P. Feng, W. Hou, Z. Bai, Y. Bai, K. Sun and Z. Wang, *Chin. Chem. Lett.*, 2023, **34**, 107427.
5. D. Qi, W. Yang, Y. Liu, J. Luan and Y.-J. Wei, *J. Power Sources*, 2025, **647**, 237377.
6. K. Wang, H. Yang, R. Yan, C. Chen, C. Wu, W. Chen, Z. He, G. Huang and L. Chang, *RSC Adv*, 2024, **14**, 15358–15364.
7. L. Liu, A. Liao, L. Lin, Y. Huang, Y. Zhang, Y. Liu, G. Gao, J. Lin, B. Sa, L. Wang, D.-L. Peng and Q. Xie, *J. Power Sources*, 2024, **608**, 234642.
8. Y. Chen, C. Lu, S. Yuan, Z. Liu, X. Ren and S. Wu, *J. Colloid. Interface. Sci.*, 2025, **680**, 405–417.
9. W. Zhang, K. Zhao, Q. Jin, J. Xiao, H. Lu, X. Zhang and L. Wu, *Electrochimica Acta*, 2022, **430**, 141104.
